# Supplementary material for: The Evolution of Mitochondrial Genomes between Two Cymbidium Sister Species: Dozens of Circular Chromosomes and the Maintenance and Deterioration of Genome Synteny
Source: MDPI journal article supplement (doi:10.3390/genes14040864), 2023-04-03

**Fig. S1 | Plant materials used in this study.** A) The morphology of *C. lancifolium*. B) Leaves of a *C. lancifolium* seedling were used for sequencing. C) The morphology of *C. macrorhizon*. D) Scapes and rhizomes of a *C. macrorhizon* seedling were used for sequencing.

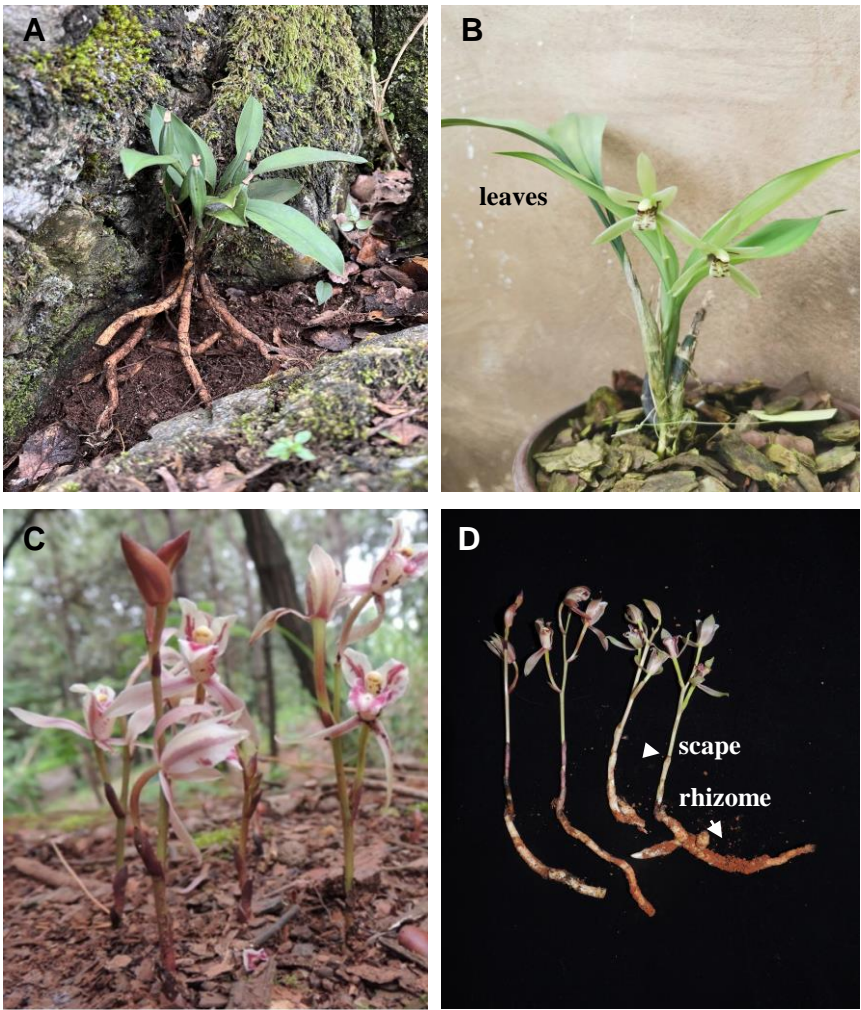

**Fig. S2 | Diagrams of Illumina-based draft assemblies.** A) *C. lancifolium* mitogenome assembly. B) *C. macrorhizon* mitogenome assembly. Contigs with high read coverage (>50x) are highlighted in green.

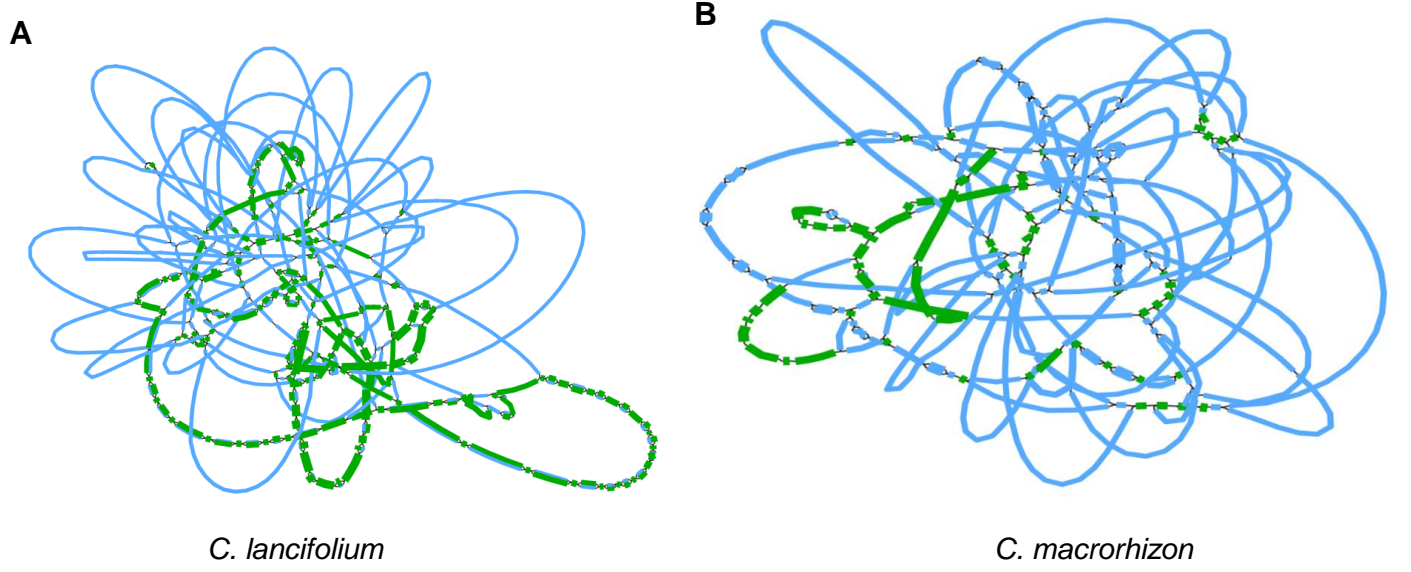

**Fig. S3 | Read coverage of the *C. lancifolium* and *C. macrorhizon* mitogenomes.** A) Read mapping plot of the *C. lancifolium* mitogenome. B) Read mapping plot of the *C. macrorhizon* mitogenome.

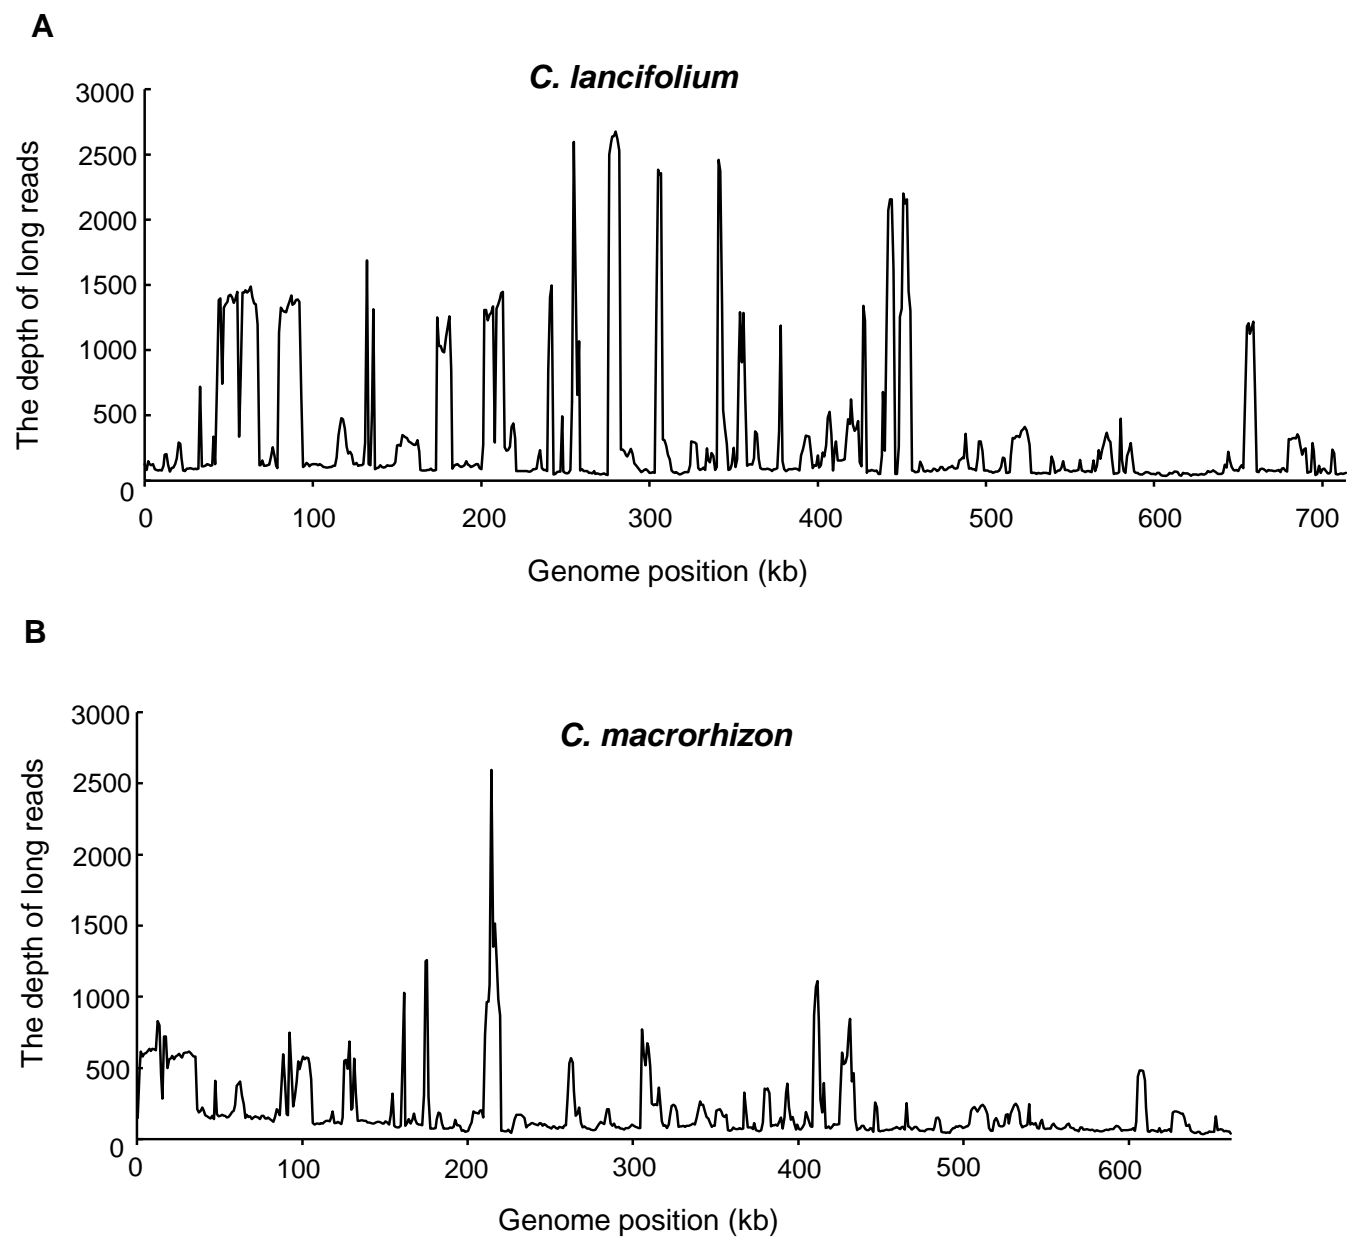

**Fig. S4 | Evolution of boundary sequences of *C. lancifolium* repeats.** A) Alignment of boundary sequences surrounding a 212 bp conserved block of 18 homologous repeats. B) Alignment of boundary sequences surrounding a 149 bp conserved block of 6 homologous repeats.

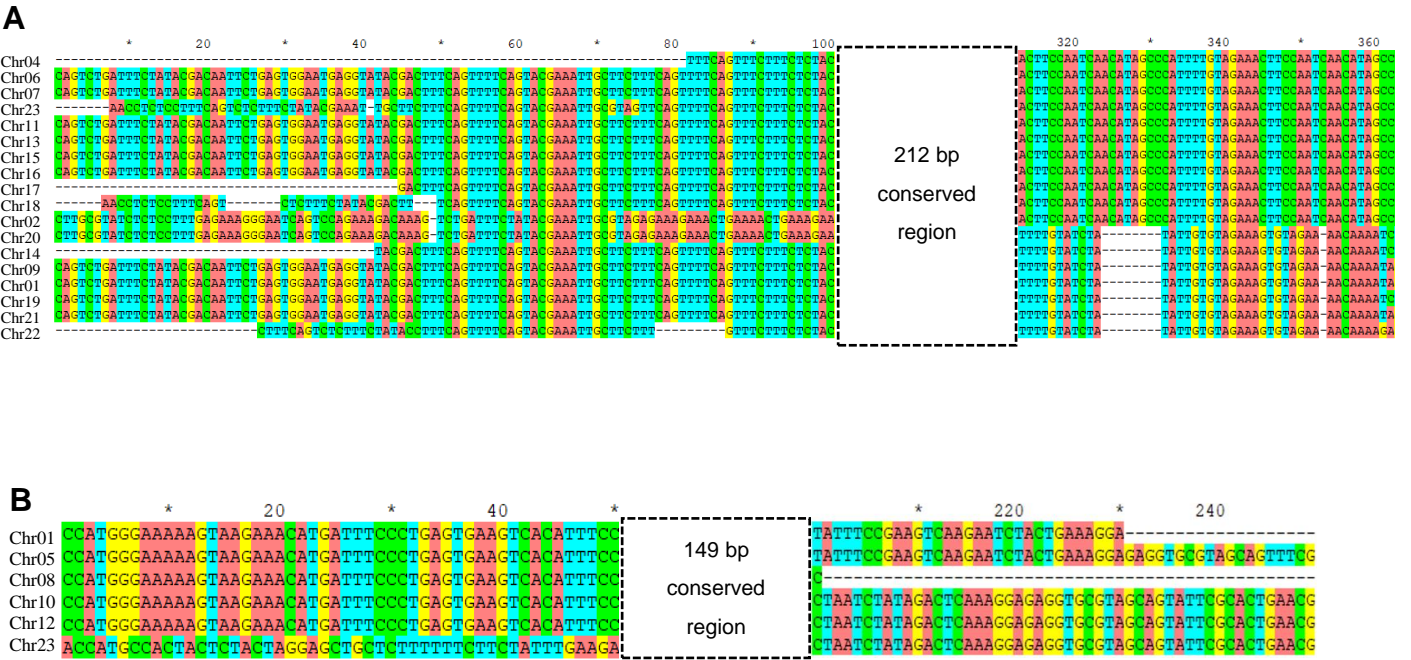

**Fig. S5 | Evolution of boundary sequences of *C. macrorhizon* repeats.** A) Alignment of boundary sequences surrounding a 140 bp conserved block of 19 homologous repeats. B) Alignment of boundary sequences surrounding a 149 bp conserved block of 6 homologous repeats.

**A**

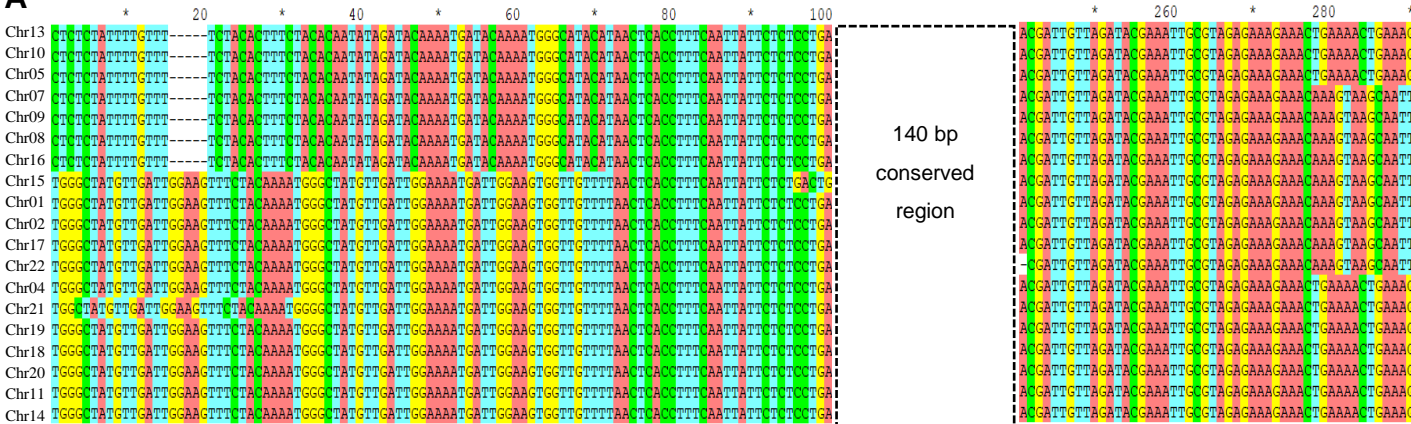

**B**

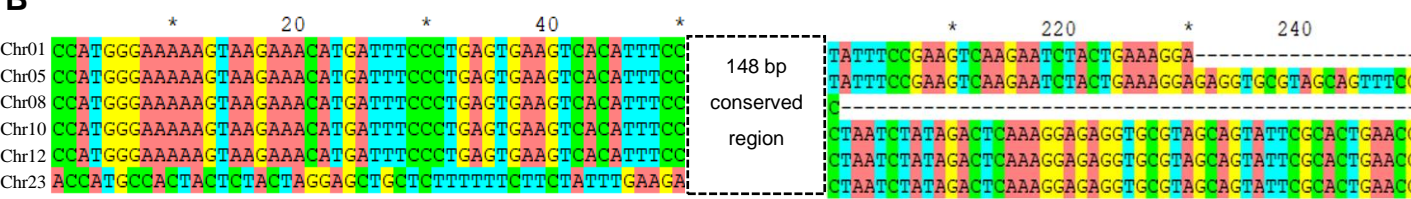

**Fig. S6 | Identification and distribution of mitochondrial DNA of plastid origin (MIPT).** A) MIPT sequences identified in chromosomes of the *C. lancifolium* mitogenome. B) MIPT sequences identified in chromosomes of the *C. macrorhizon* mitogenome. CP: chloroplast; Chr: chromosome. Red lines link homologous sequences with > 95% similarity and blue lines link homologous sequence with >90% similarity.

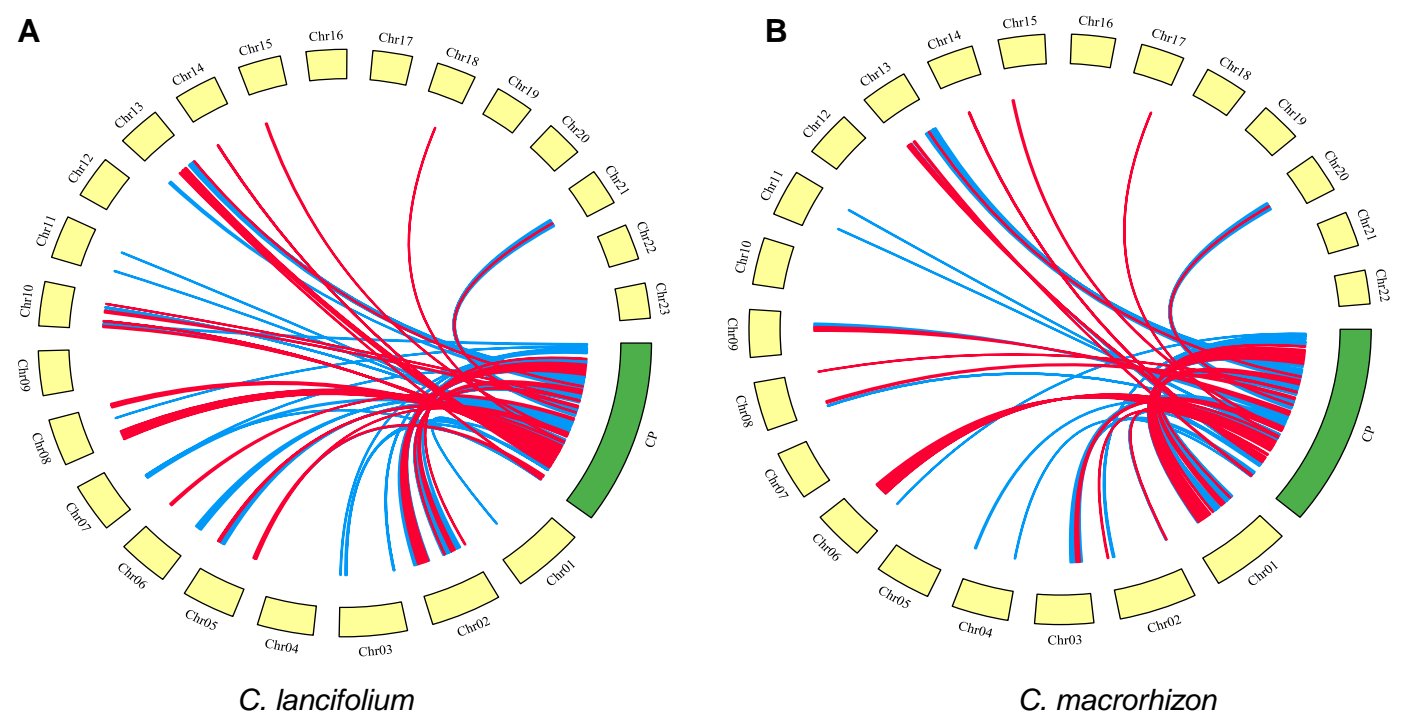

Supplement: s1 [file s1]
